# Supplementary material for: (−)-Epicatechin gallate blocked cellular foam formation in atherosclerosis by modulating CD36 expression in vitro and in vivo
Source: Royal Society of Chemistry journal article supplement (doi:10.1039/d2fo03218j), 2023-01-01
Supplement: d2fo03218j3.pdf [file d2fo03218j3.pdf]

Uncropped version of western blot protein bands

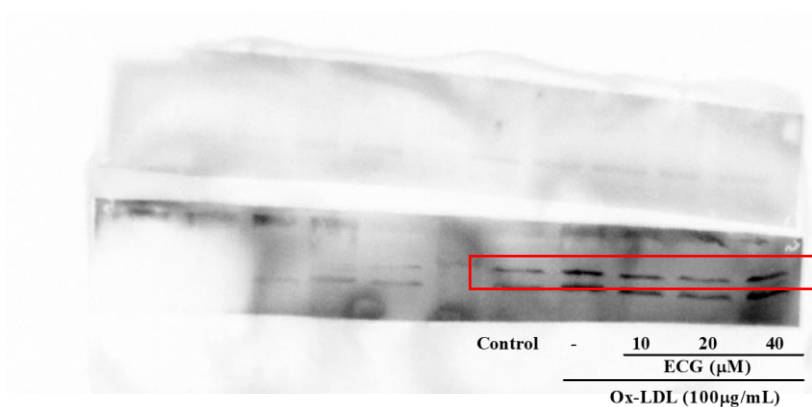

CD36

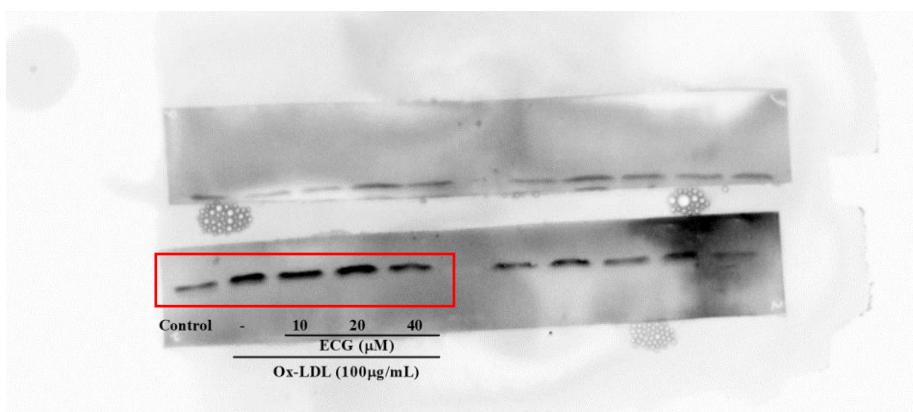

LOX-1

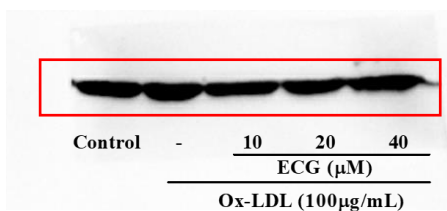

β-actin-1

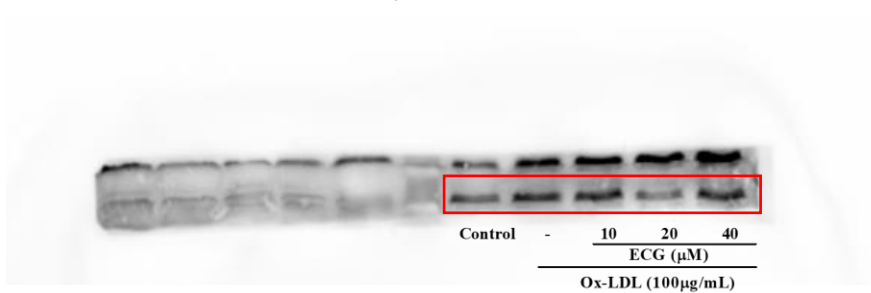

MMP-2

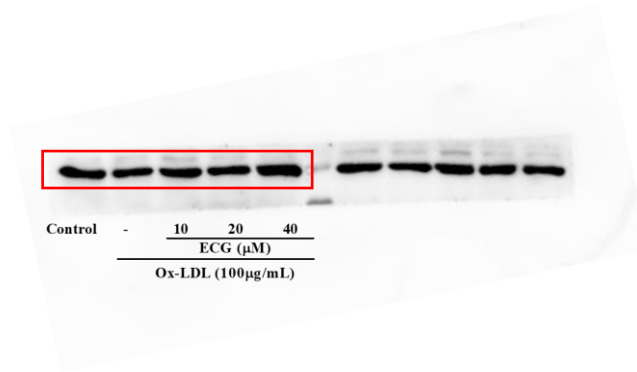

$\beta$ -actin-2

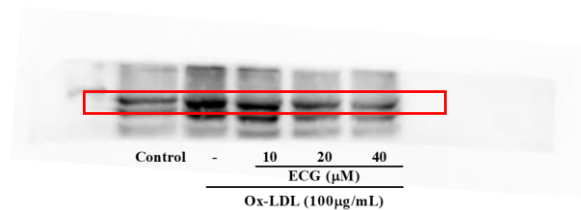

CD86

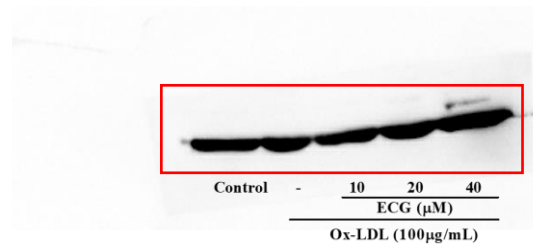

$\beta$ -actin-3

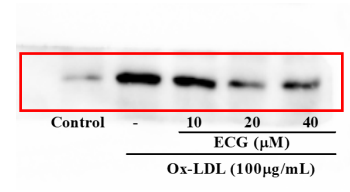

Bax

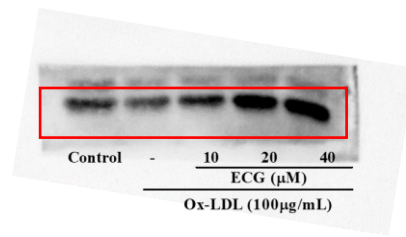

Bcl-2

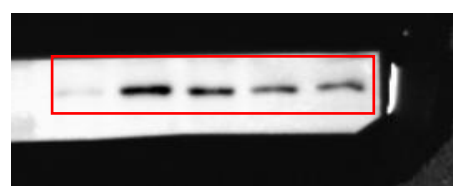

Cleaved caspase-3

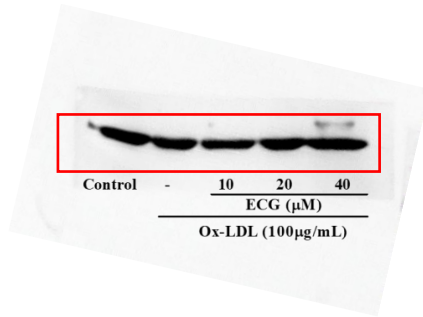

$\beta$ -actin-4

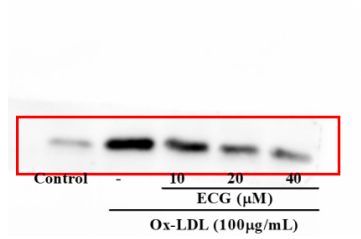

p-I $\kappa$ B $\alpha$

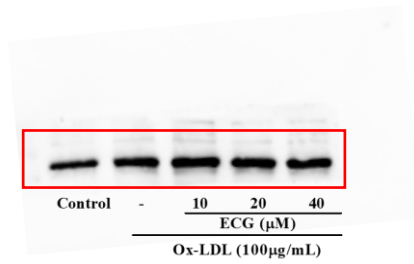

I $\kappa$ B $\alpha$

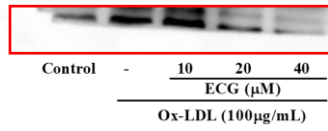

p-p65

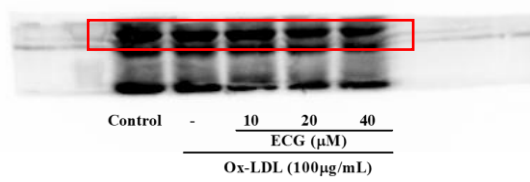

p65

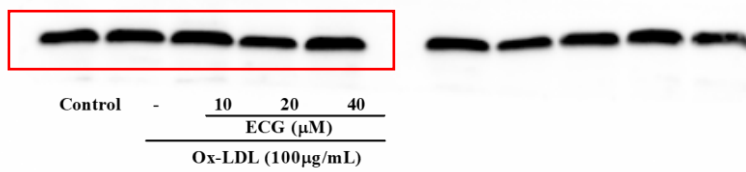

$\beta$ -actin-5

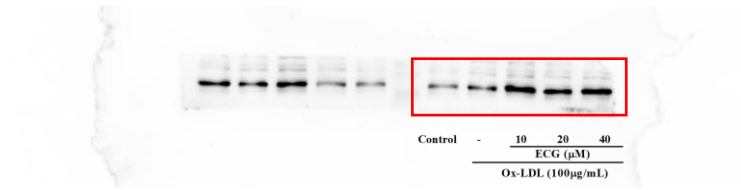

Nrf2

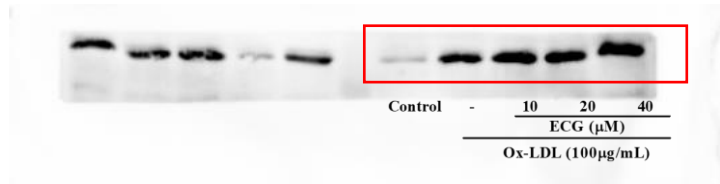

HO-1

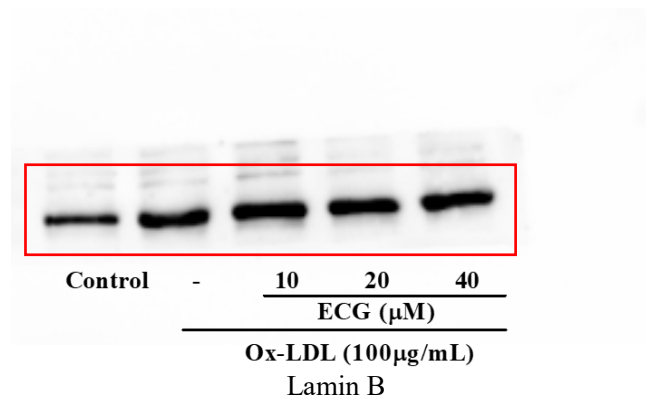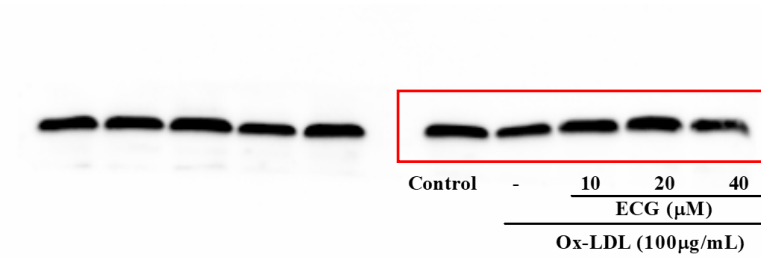

β-actin-6
