# Supplementary figures and images for: (−)-Epicatechin gallate blocked cellular foam formation in atherosclerosis by modulating CD36 expression in vitro and in vivo
Source: Royal Society of Chemistry journal article supplement (doi:10.1039/d2fo03218j), 2023-01-01

## RAW264.7

A

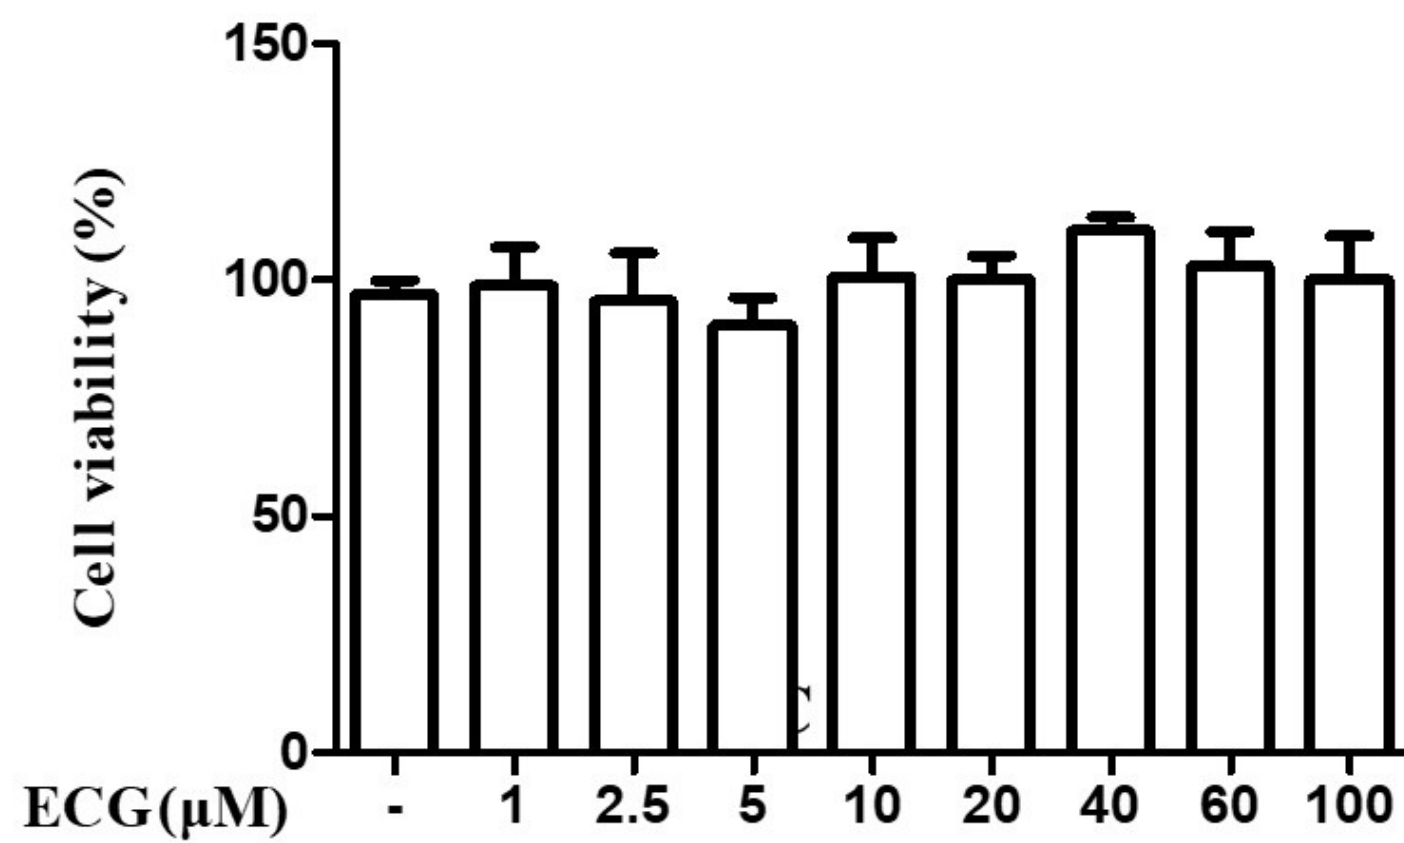

B

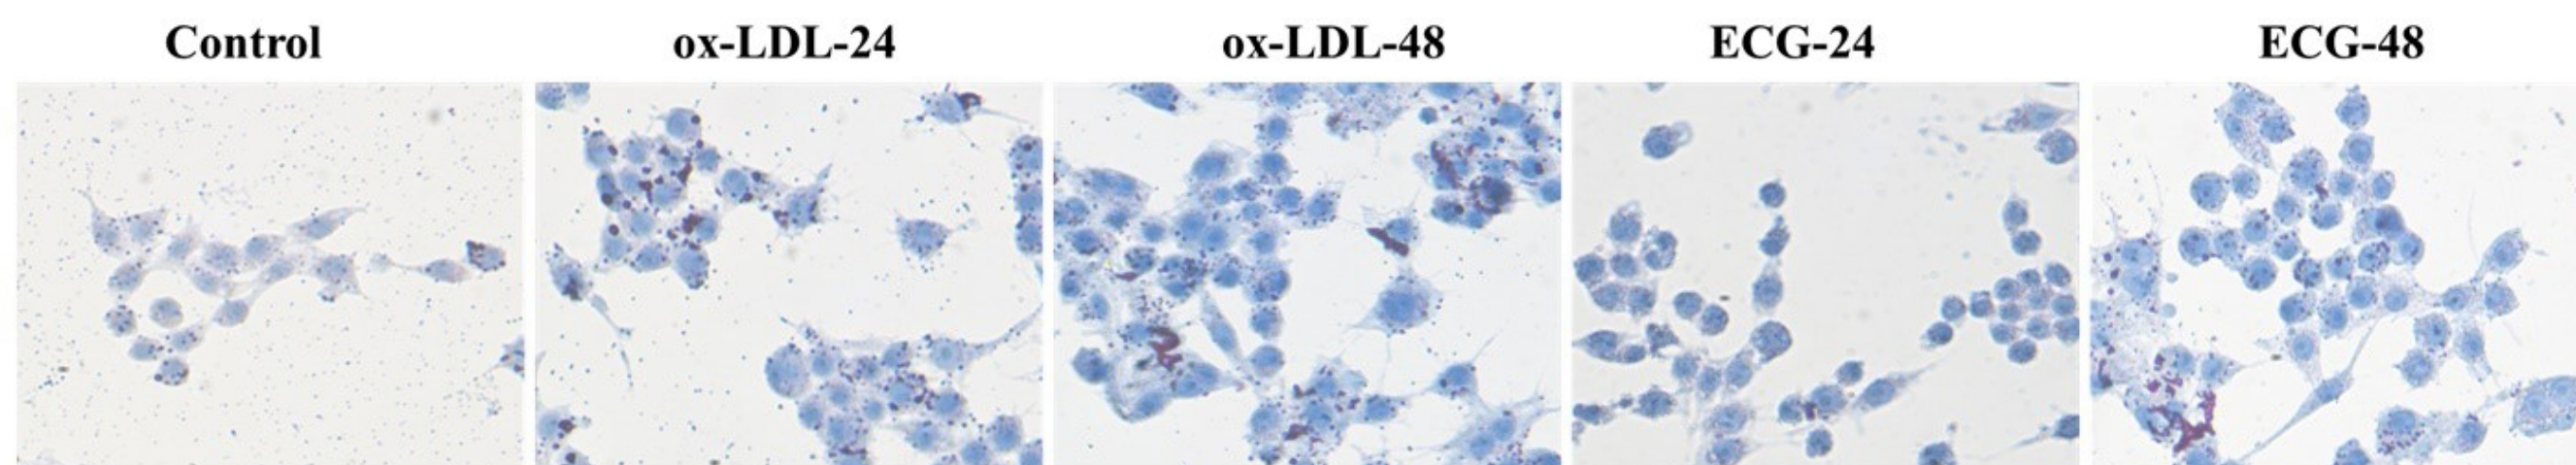

C

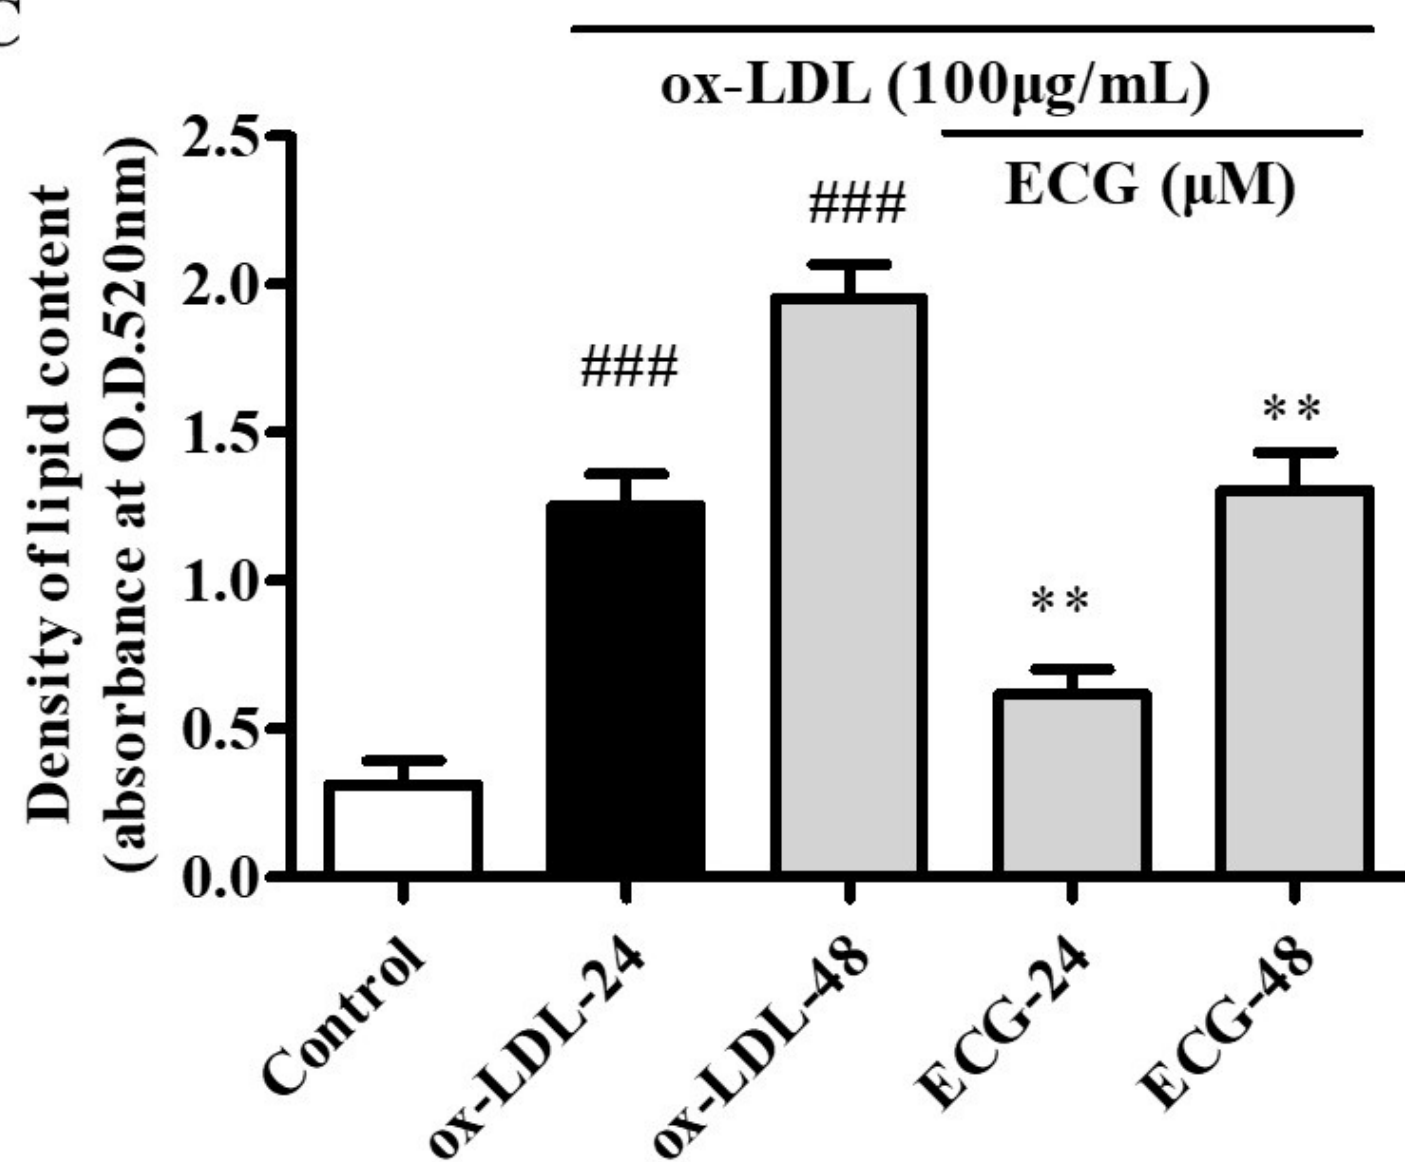

D

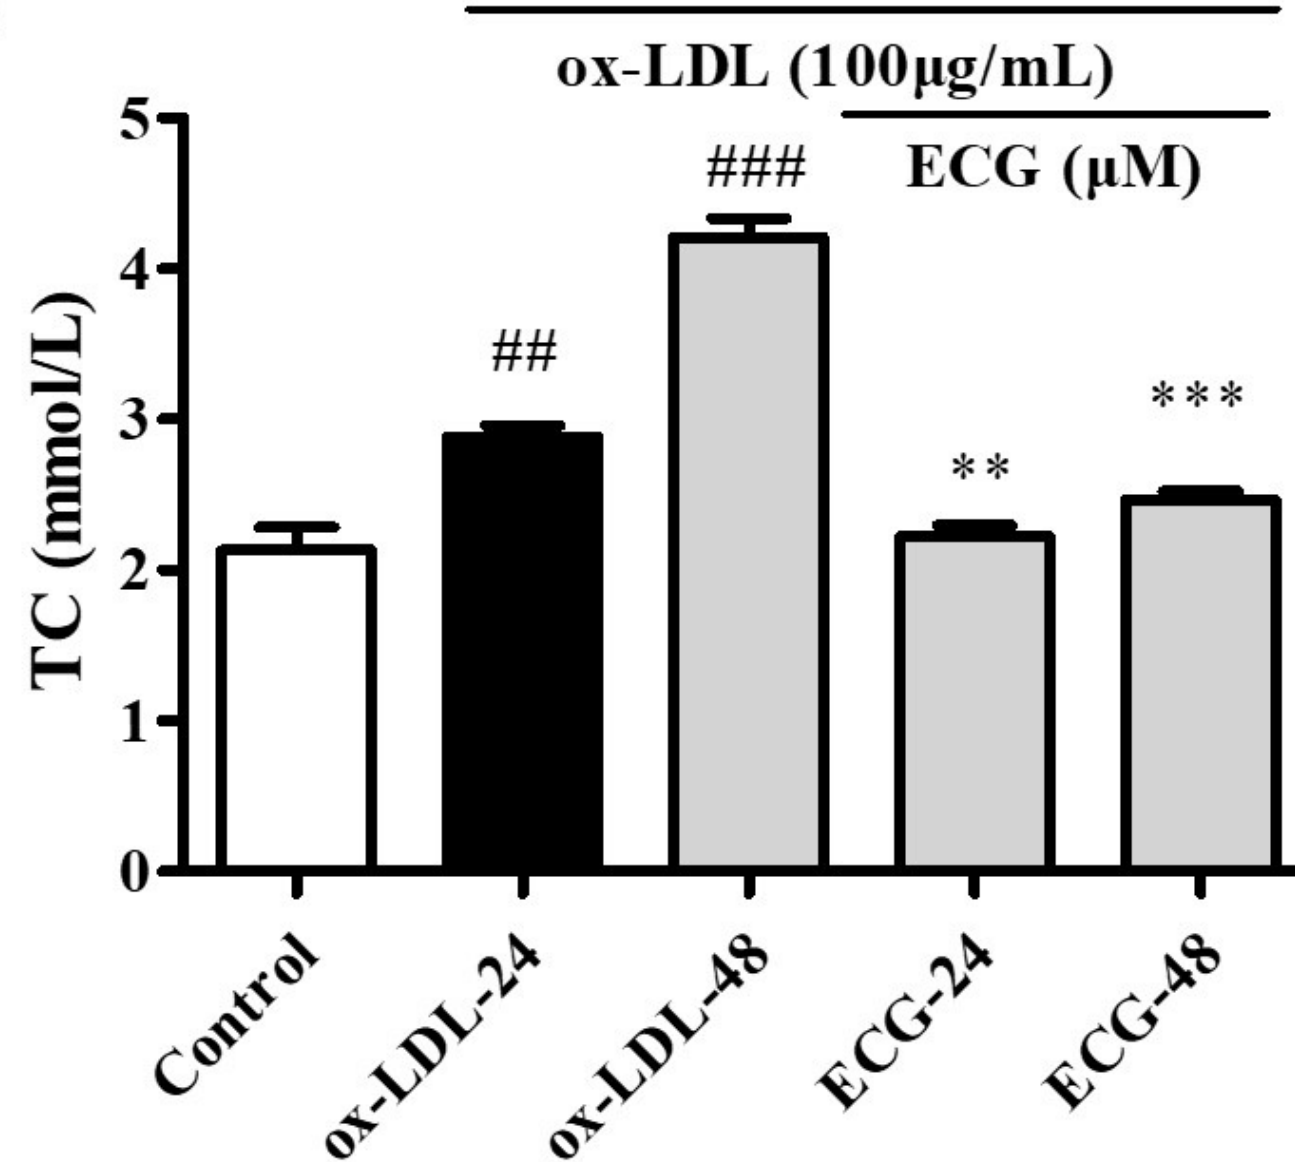

Supplement: d2fo03218j2.pdf [file d2fo03218j2.pdf]
